# Supplementary material
Source: publisher figshare collection journal article supplement (https://frontiersin.figshare.com/ndownloader/files/15221096)
Supplement: Supplementary file [file 15221096]

## Supplementary Figure 1

$^1\text{H}$  NMR spectrum of exo-norbormide (400 MHz,  $\text{CDCl}_3$ )

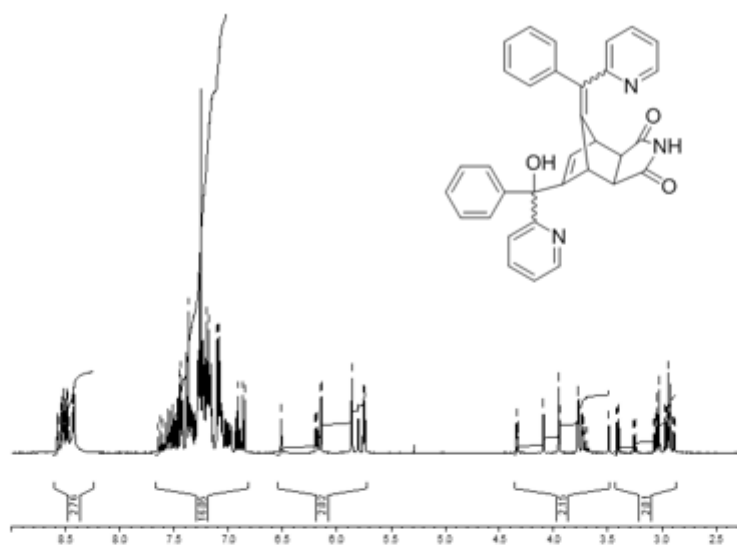

RP-HPLC chromatogram of exo-norbormide

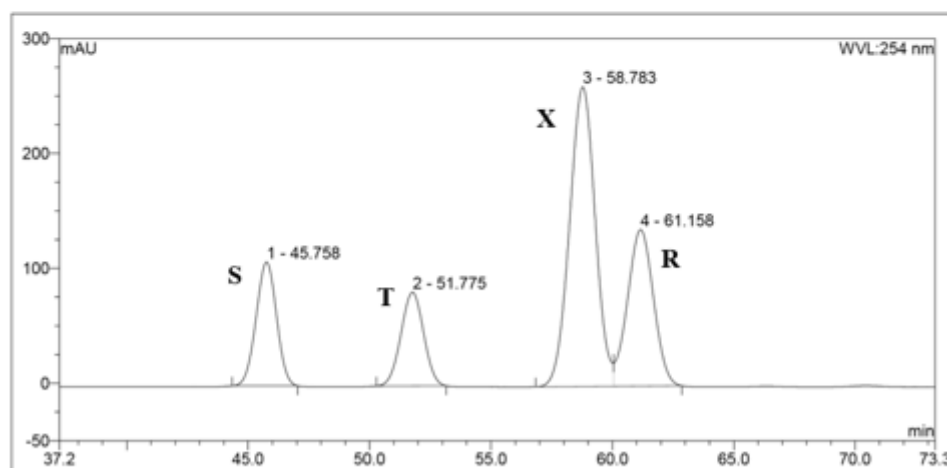

| Stereoisomeric composition (%) |    |   |    |    |    |   |   |
|--------------------------------|----|---|----|----|----|---|---|
| W                              | S  | U | T  | X  | R  | V | Y |
| 0                              | 14 | 0 | 14 | 46 | 26 | 0 | 0 |
